# Supplementary material
Source: publisher figshare collection journal article supplement (https://future-science-group.figshare.com/ndownloader/files/34132059)
Supplement: Supplementary file 1 [file 34132059]

Supplementary Table 1. Frequency of recorded diagnoses of ER visits within 3 months prior to colorectal cancer diagnosis.

| First ER recorded diagnosis | N (%)* |
| --- | --- |
| Intestinal infectious diseases (A00-A09) | 341 (2.07%) |
| Unspecified/other sepsis (A41-A64) | 61 (0.37%) |
| Specific viral infections (B01-B99) | 46 (0.28%) |
| Colorectal cancer (C18-20) | 775 (4.72%) |
| Other malignant neoplasms (all other C category) | 281 (1.71%) |
| Benign/uncertain behavior neoplasms (D00-D48) | 141 (0.85%) |
| Anemia (D50-D64) | 1028 (6.26%) |
| Other blood disorders (D65-D89) | 17 (0.1%) |
| Endocrine/metabolic/ nutritional disorders (E00-E90) | 261 (1.59%) |
| Mental and behavioral disorders (F00-F99) | 128 (0.78%) |
| Nervous system disorders (G00-G99) | 78 (0.47%) |
| Eye/ear disorders (H00-H95) | 97 (0.59%) |
| Circulatory disorders (I00-I99) | 782 (4.76%) |
| Respiratory disorders (J00-J99) | 558 (3.39%) |
| Intestinal obstruction (K56) | 1387 (8.44%) |
| GI hemorrhage (K92.0,92.1,92.2) | 1179 (7.18%) |
| Other digestive disorders (K00-K93; except K56, K92.0,92.1,92.2) | 2822 (17.18%) |
| Skin disorders (L00-L99) | 193 (1.75%) |
| Musculoskeletal disorders (M00-M99) | 400 (2.43%) |
| Genitourinary disorders (N00-N99) | 604 (3.67%) |
| Pregnancy/puerperal disorders (O00-O99) | 14 (<0.1%) |
| Congenital disorders (Q00-Q07) | 1 (<0.1%) |
| Abdominal/pelvic pain (R10) | 1666 (10.14%) |
| Other non-specific symptoms/signs (R00-R99; except R10) | 1801 (10.96%) |
| Injuries/poisoning (S00-T98) | 567 (3.45%) |
| Factors influencing health status and contact with health services (Z00-Z99) | 1192 (7.25%) |

*Decimals were kept to two decimals in this table.
